# Supplementary material for: Anti-cancer effect of a novel 2,3-didithiocarbamate-substituted naphthoquinone as a tumor metabolic suppressorin vitroandin vivo
Source: Royal Society of Chemistry journal article supplement (doi:10.1039/c8md00062j), 2018-01-01
Supplement: c8md00062j1.pdf [file c8md00062j1.pdf]

## Supplemental Information

### Anti-cancer effect of a novel 2, 3-didithiocarbamate substituted naphthoquinone as a tumor metabolic suppressor in vitro and vivo

Xianling Ning<sup>a</sup>, Yunqiao Li<sup>a, c</sup>, Hailong Qi<sup>a, b</sup>, Ridong Li<sup>a</sup>, Yan Jin<sup>a</sup>, Junyi Liu<sup>d\*</sup> and Yuxin Yin<sup>a, b, c\*</sup>

<sup>a</sup>*Institute of Systems Biomedicine, School of Basic Medical Sciences, Beijing Key Laboratory of Tumor Systems Biology, Peking University Health Science Center, Beijing, China.*

<sup>b</sup>*Peking-Tsinghua Center for Life Sciences, Peking University Health Science Center, Beijing, China.*

<sup>c</sup>*Department of Pathology, School of Basic Medical Sciences, Peking University Health Science Center, Beijing, China.*

<sup>d</sup>*State Key Laboratory of Natural and Biomimetic Drugs, Department of Chemical Biology, School of Pharmaceutical Sciences, Peking University Health Science Center, Beijing, China.*

Corresponding authors

\*Email address: yinyuxin@hsc.pku.edu.cn

\*Email address: jyliu@bjmu.edu.cn

---

\* Corresponding author

Email address: jyliu@bjmu.edu.cn

\* Corresponding author

Email address: yinyuxin@hsc.pku.edu.cn

### <sup>1</sup>H NMR of compound 3i:

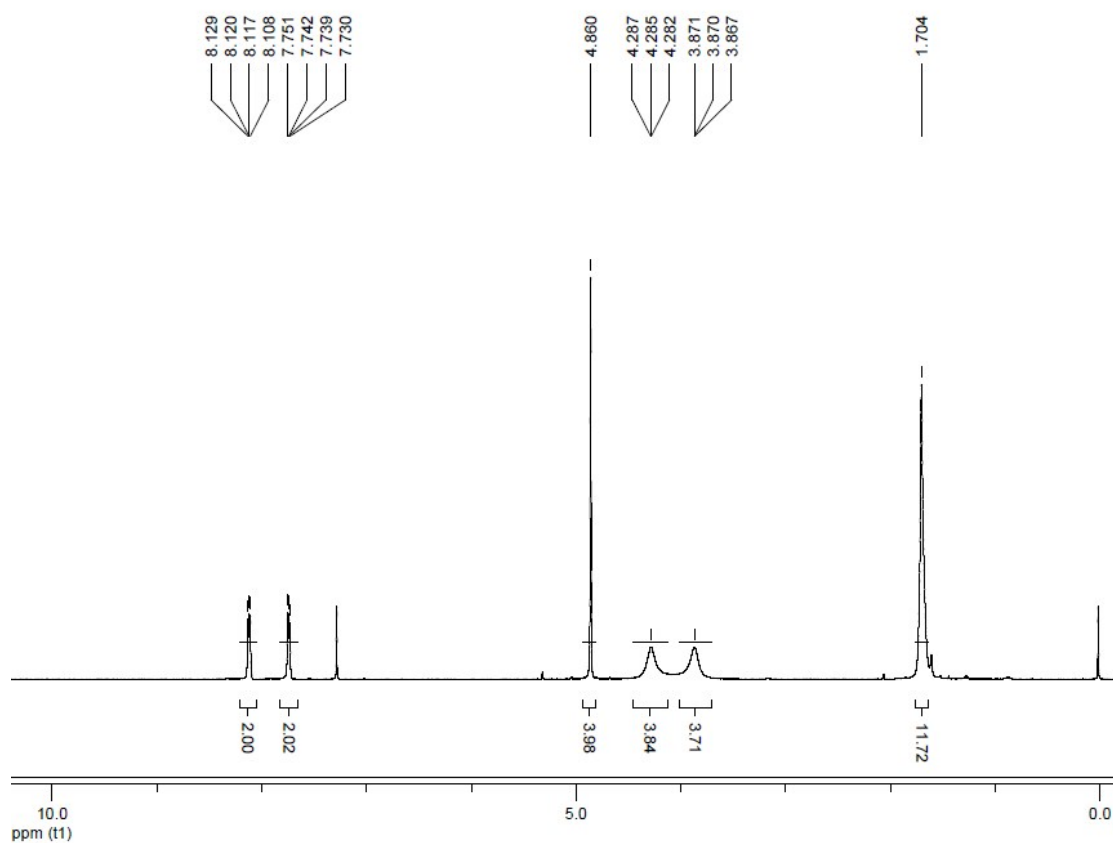

### <sup>13</sup>C NMR of compound 3i:

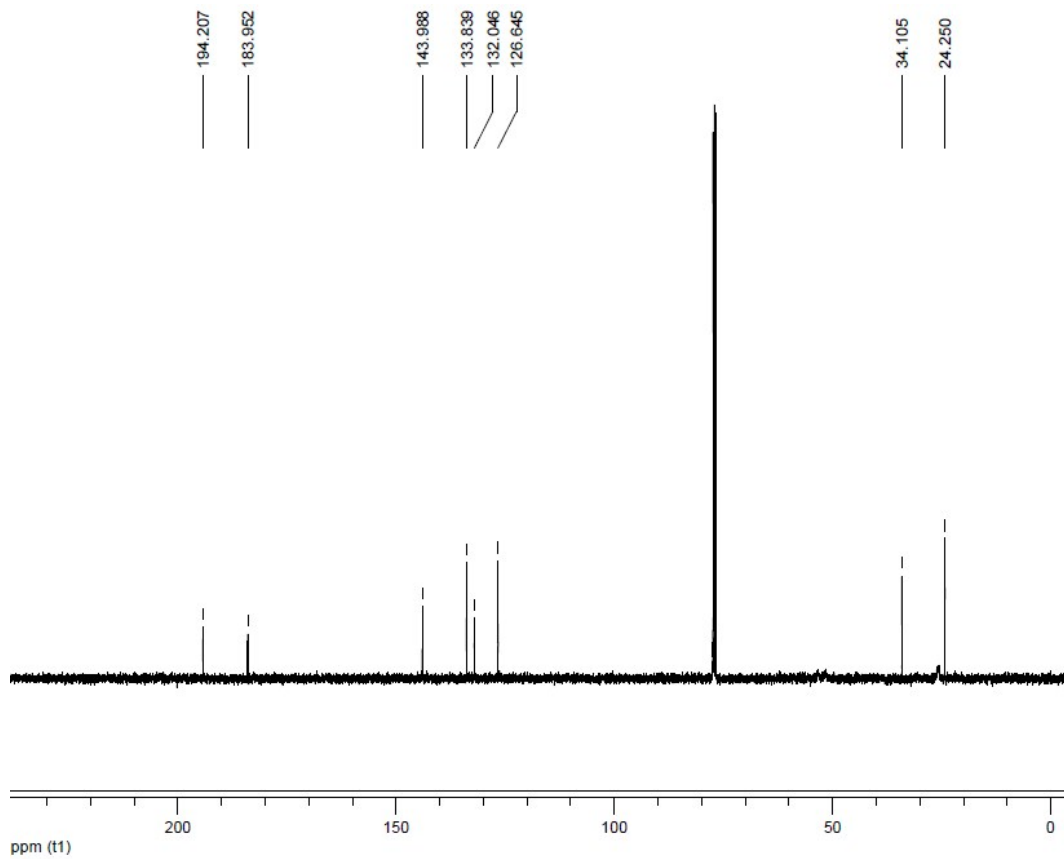

Table S1. The primers sequences of quantitative real-time PCR

|       | Forward Primer          | Reverse Primer         |
|-------|-------------------------|------------------------|
| GLUT1 | CATCAACGCTGTCTTCTATTACT | CCACGATGCTCAGATAGGAC   |
| C     |                         |                        |
| LDH   | TGGTTGAGAGTGCTTATGAGG   | CTGAGATTCCATTCTGTCCCA  |
| CCND1 | CCTCTAAGATGAAGGAGACCA   | AAATGAACTTCACATCTGTGGC |
